# Supplementary material
Source: PubMed Central journal article supplement (PMC2629182)
Supplement: 0807665106_0807665106SI.pdf [file 0807665106_0807665106SI.pdf]

# Supporting Information

Matsuno *et al.* 10.1073/pnas.0807665106

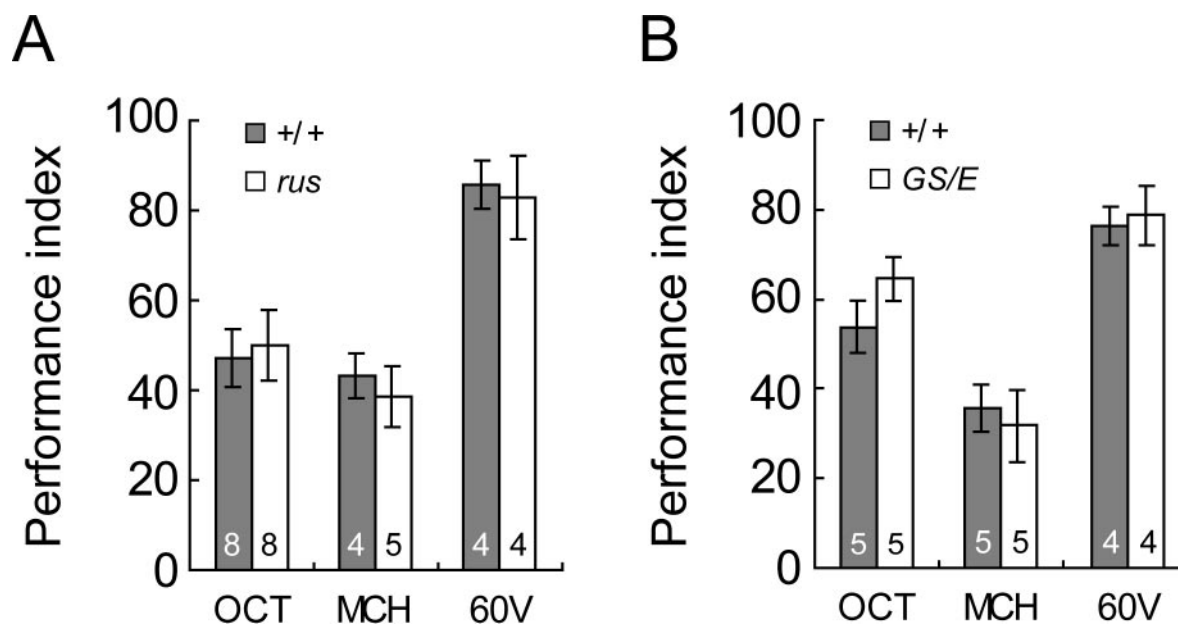

**Fig. S1.** Sensorimotor responses are not disrupted by *klg* mutations. Sensorimotor responses are not impaired in *klg<sup>rus</sup>* (A) and in *klg<sup>GS10439</sup>/kglg<sup>E226</sup>* (B) flies. Avoidance of odors and 60V electrical shocks, which were used for olfactory conditioning, are indicated. OCT, octanol; MCH, 4-methylcyclohexanol.

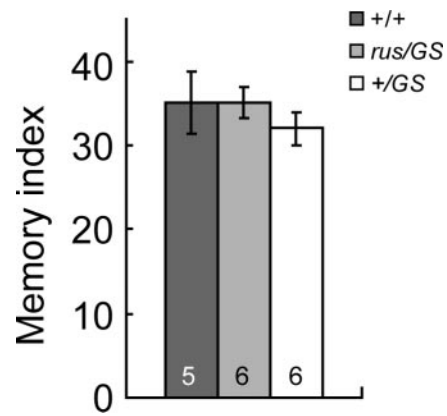

**Fig. S2.** The *klg<sup>GS10439</sup>* mutation is recessive for memory defects. Both *klg<sup>GS10439</sup>* and *klg<sup>rus</sup>* (Fig. 1E) are recessive for memory defects. LTM is normal in *klg<sup>rus</sup>/klg<sup>GS10439</sup>* flies because the *klg<sup>rus</sup>* mutation results from insertion of a P-GAL4 transposon, while the *klg<sup>GS10439</sup>* mutation results from insertion of a P-UAS transposon. GAL4-dependent induction of *klg* expression rescues the LTM defects in *klg<sup>rus</sup>/klg<sup>GS10439</sup>* flies.







**Table S1. Primer sequences used for semi-quantitative and q-PCR**

|                | Upstream                       | Downstream                     |
|----------------|--------------------------------|--------------------------------|
| Semi-qPCR      |                                |                                |
| <i>GPDH</i>    | 5'-CCTACTGCCGAGGAGGTCAACTA-3'  | 5'-GCTCAGGGTGATTGCGTATGCA-3'   |
| <i>GAL4</i>    | 5'-GCCAATTTTAATCAAAGTGGAATA-3' | 5'-GTTTGGTGGGGTATCTTCATCATC-3' |
| <i>CG31281</i> | 5'-GTCACCCACTTCACTCAATCAA-3'   | 5'-GCGAGCTAATGCTTTGCTATTT-3'   |
| <i>klg</i>     | 5'-AACTCCGGAACCTAGAACTCC-3'    | 5'-GATTACCAGATCCCTTGCACTC-3'   |
| <i>CG6660</i>  | 5'-TTGGCTACCTCACCTTTCATTT-3'   | 5'-TTGCGTATGTAGGTCTTGCAGT-3'   |
| <i>rp49</i>    | 5'-CACCGGATTCAAGAAGTTCC-3'     | 5'-GACAATCTCCTTGCGCTTCT-3'     |
| q-PCR          |                                |                                |
| <i>GAPDH1</i>  | 5'-TCCTGGGCTACACCGATGA-3'      | 5'-GGCGTCGAACACAGACGAA-3'      |
| <i>klg</i>     | 5'-GGAGTGCAAGGGATCTGGTA-3'     | 5'-GCTCCAGCTTCTCCAGTGTC-3'     |
